# Supplementary material
Source: PubMed Central journal article supplement (PMC3493173)
Supplement: NIHMS417017-supplement-Supporting_Information.pdf [file NIHMS417017-supplement-Supporting_Information.pdf]

**Supporting Information** for “Metal-Assisted and Microwave-Accelerated Evaporative Crystallization: Application to L-Alanine” by Alabanza and Aslan, Morgan State University, Department of Chemistry, 1700 East Cold Spring Lane, Baltimore, MD, 21251, USA.

## **Materials**

Silver nitrate was purchased from Spectrum Chemical MFG Corp. Sodium hydroxide, ammonium hydroxide, D-glucose, and L-Alanine were purchased from Sigma-Aldrich. All chemicals were used as received.

## **Methods**

**Preparation of Silver Island Films.** Silver island films were deposited onto glass slides (Corning) as using the procedures described in publication from our laboratory.  $\text{AgNO}_3$  was precipitated by the addition of 5% NaOH, then quickly redissolved by the addition of  $\text{NH}_4\text{OH}$ . The solution was then cooled to  $5^\circ\text{C}$  and blank glass slides were immersed in the solution for two minutes. D-glucose was added and the slides were removed once they were coated with a green color, after 5-7 minutes.

**Preparation of L-Alanine solution.** A 2.70 M solution of L-Alanine was prepared by dissolving appropriate amounts of L-Alanine in double-distilled water (Millipore), then heated to  $60^\circ\text{C}$  for up to 15 minutes, or until the solution appeared colorless and transparent. The pH of the prepared solution was slightly acidic at 5.3 (isoelectric point = 6) and was used in all experiments without changing the pH. The solution was stored in a 20 mL glass vial (Corning) at room temperature in between uses, and was heated to  $60^\circ\text{C}$  for 10 minutes before each use.

**Crystallization of L-Alanine.** L-Alanine was deposited in 20  $\mu\text{L}$  drops onto blank glass slides (Corning) and SIFs, and was observed for crystallization at room temperature and MA-MAEC. Room temperature crystallization was carried out on an open laboratory bench without interference. The MAEC technique was performed in a conventional microwave oven (Frigidaire, 900 W) at microwave power levels 1, 5, and 10.

Timed images of growing crystals were recorded with a Swift Digital M10L Monocular Microscope (Swift). The Raman spectra of L-Alanine crystals were observed using a Raman spectrometer system (*i*-Raman from BW Tek, Inc. DE).

### Glass\_MW\_PL5

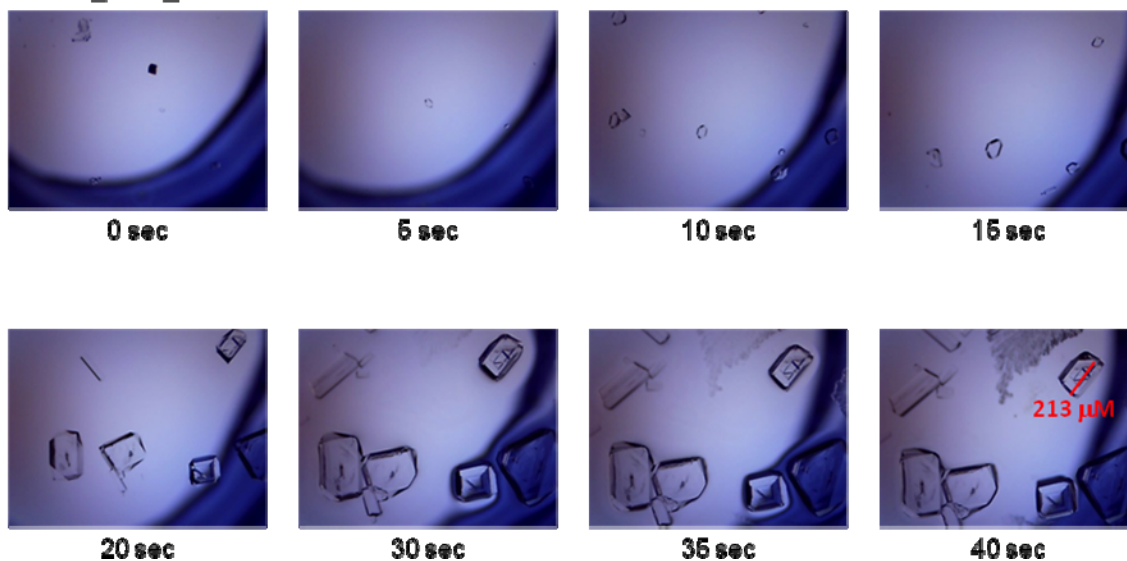

**Figure S1.** Time progression of the growth of L-alanine crystals on blank glass slides using MAEC technique at microwave power level 5. Actual length of the crystals is x4 of the lengths shown here.

### Glass\_MW\_PL10

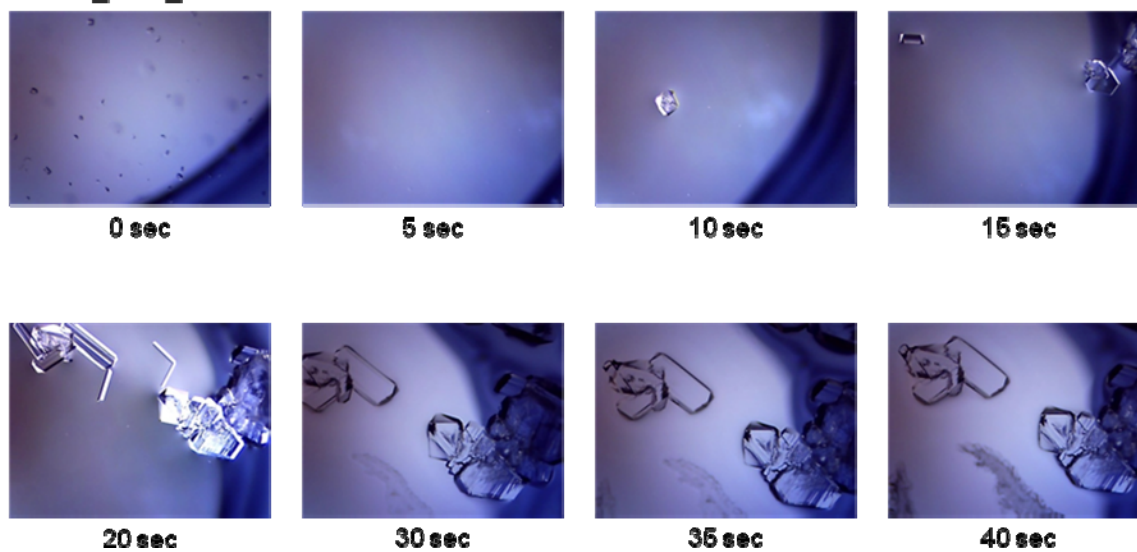

**Figure S2.** Time progression of the growth of L-alanine crystals on blank glass slides using MAEC technique at microwave power level 10. Actual length of the crystals is x4 of the lengths shown here.

### Glass\_RT

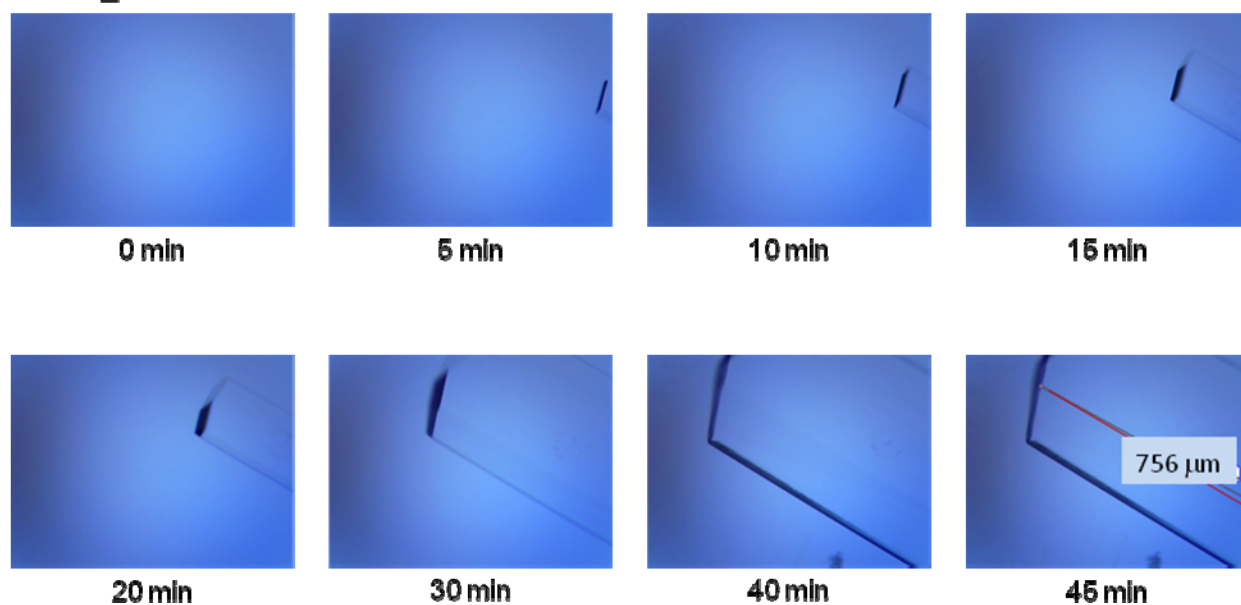

**Figure S3.** Time progression of the growth of L-alanine crystals on blank glass slides at room temperature. Actual length of the crystals is x4 of the lengths shown here.

### SIFs\_MW\_PL5

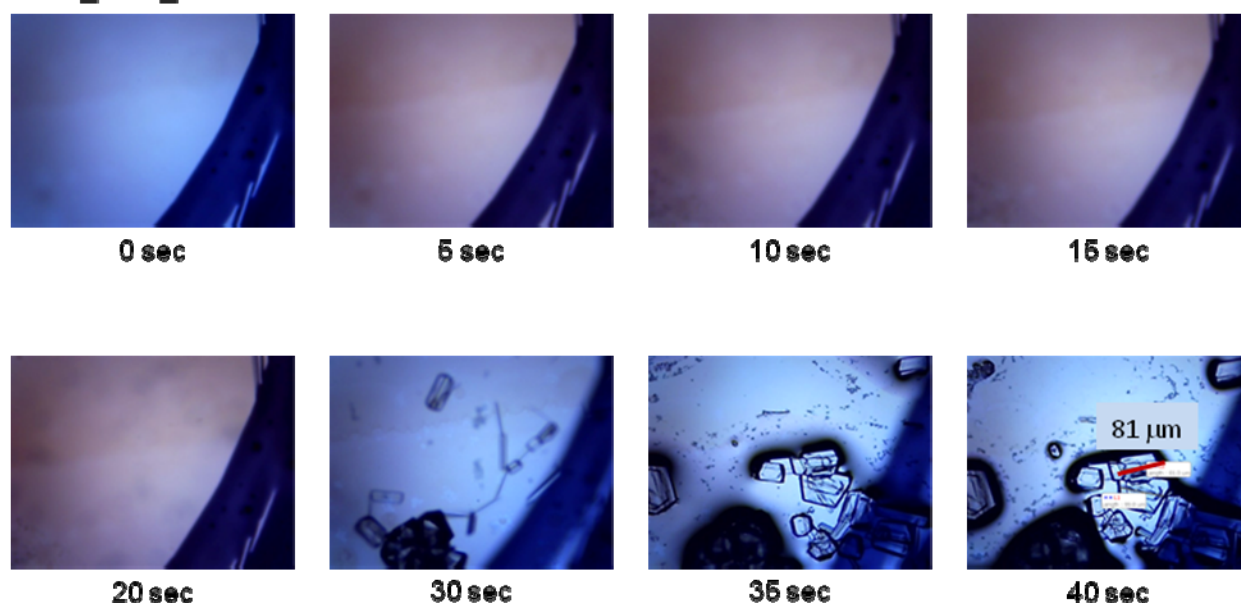

**Figure S4.** Time progression of the growth of L-alanine crystals on SIFs using MA-MAEC technique at microwave power level 5. Actual length of the crystals is x4 of the lengths shown here.

### SIFs\_MW\_PL10

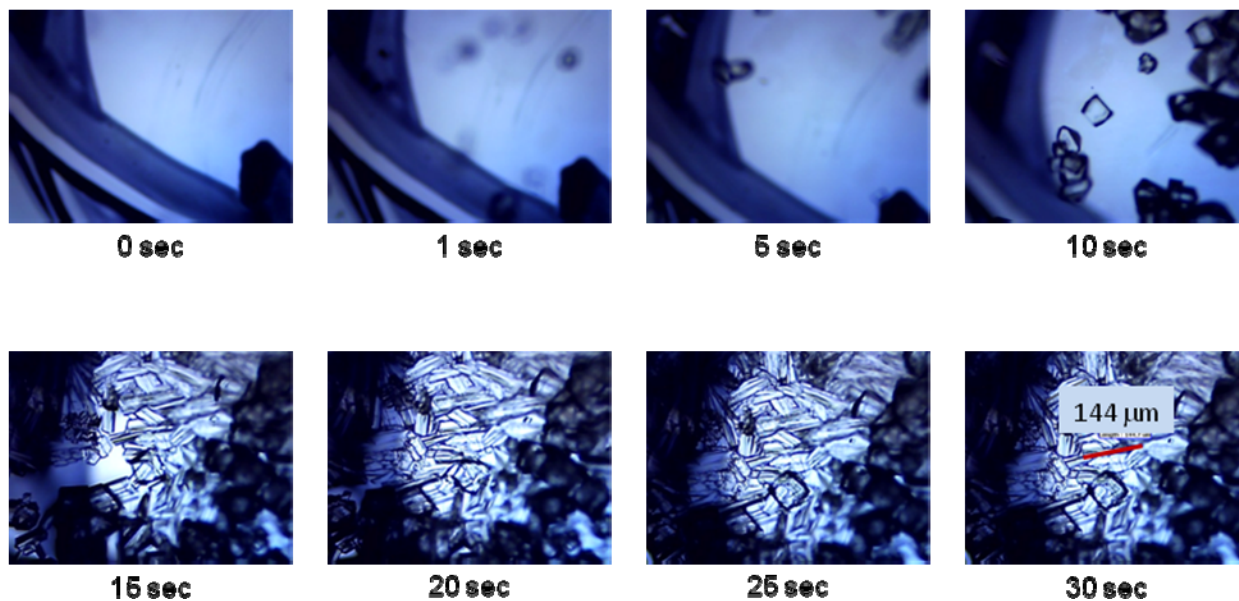

**Figure S6.** Time progression of the growth of L-alanine crystals on SIFs using MA-MAEC technique at microwave power level 10. Actual length of the crystals is x4 of the lengths shown here.

### SIFs\_RT

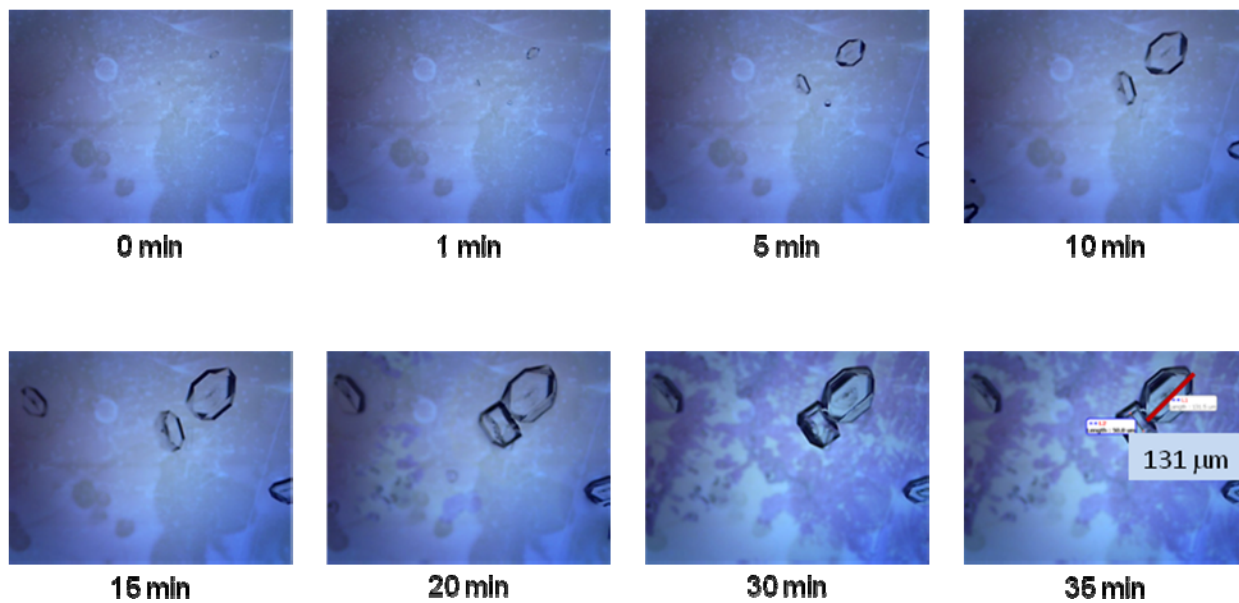

**Figure S7.** Time progression of the growth of L-alanine crystals on SIFs at room temperature. Actual length of the crystals is x4 of the lengths shown here.

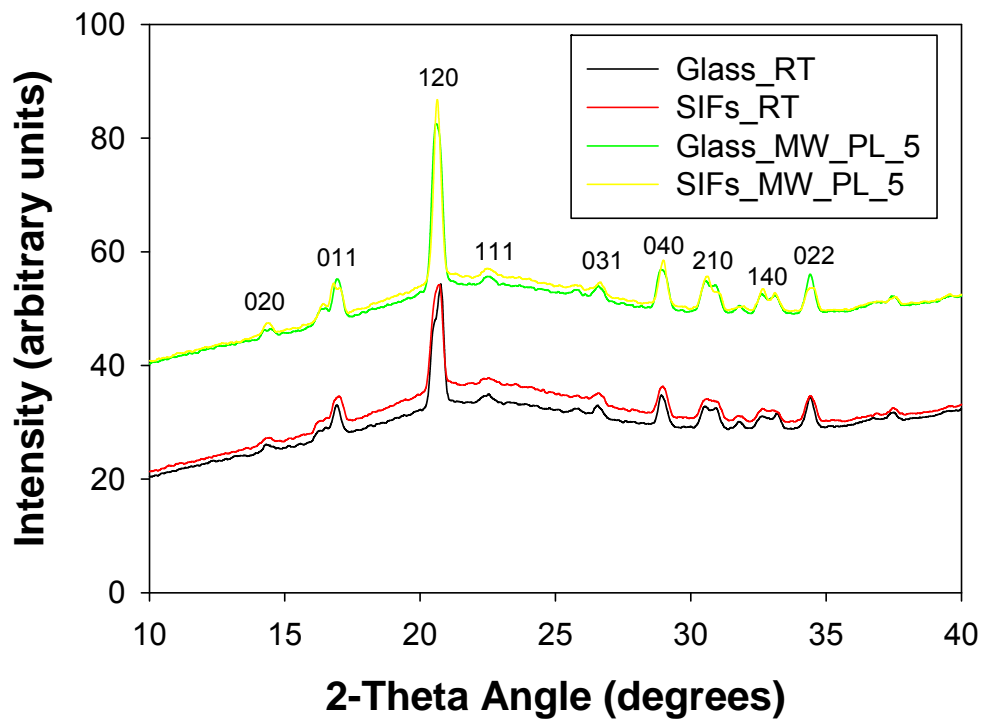

Figure S8. Powder X-Ray diffraction patter of L-alanine crystals grown in this study.
